# Supplementary figures and images for: Mono-emulsion droplet stretching under direct current electric field
Source: Royal Society of Chemistry journal article supplement (doi:10.1039/c8sm01750f), 2019-01-01

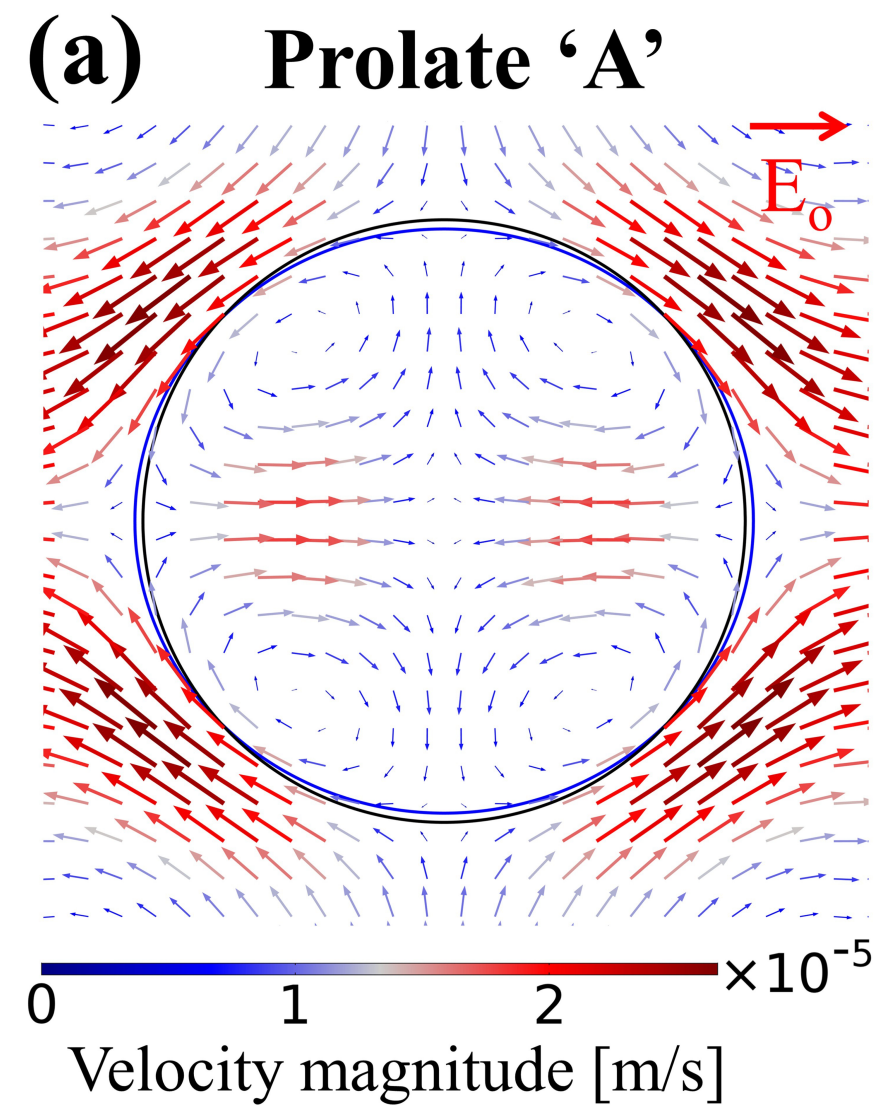

$$S/R < 1$$
$$R=34.48, S=1.47$$

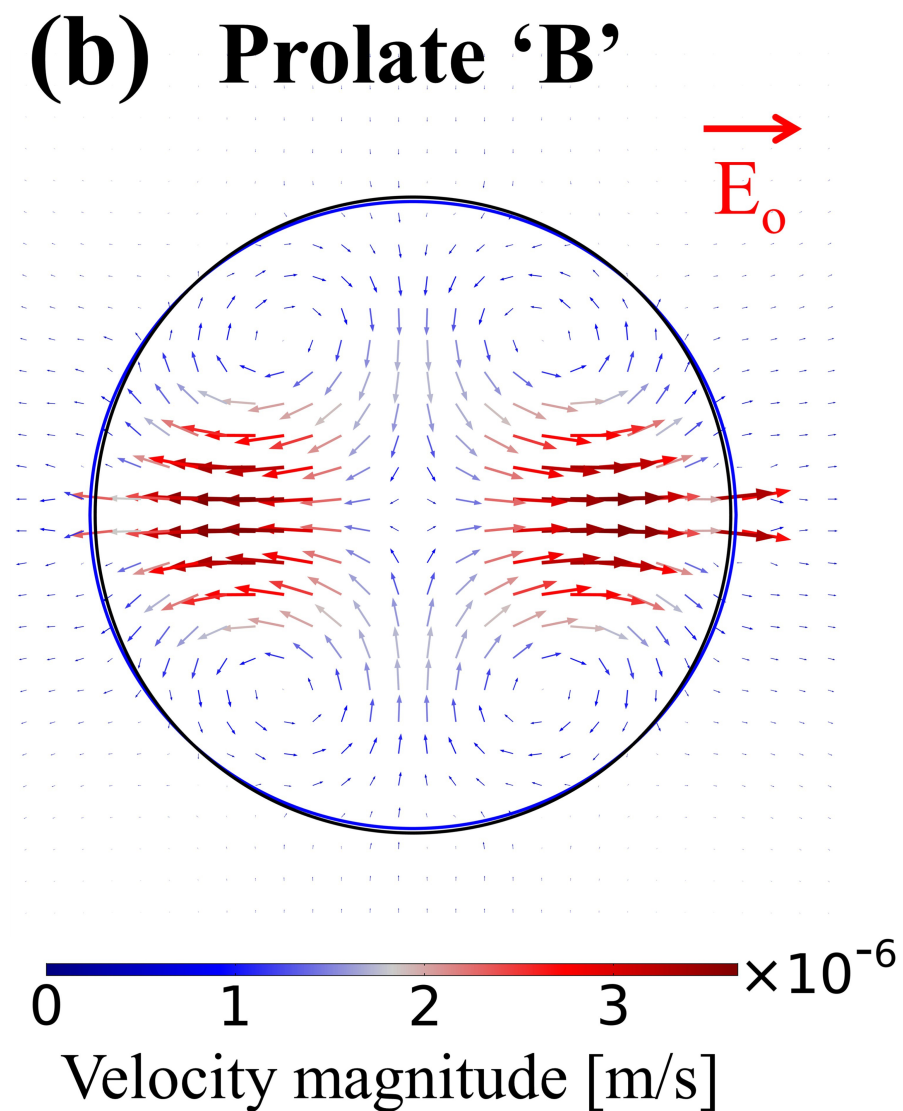

$$S/R > 1$$
$$R=0.029, S=0.07$$

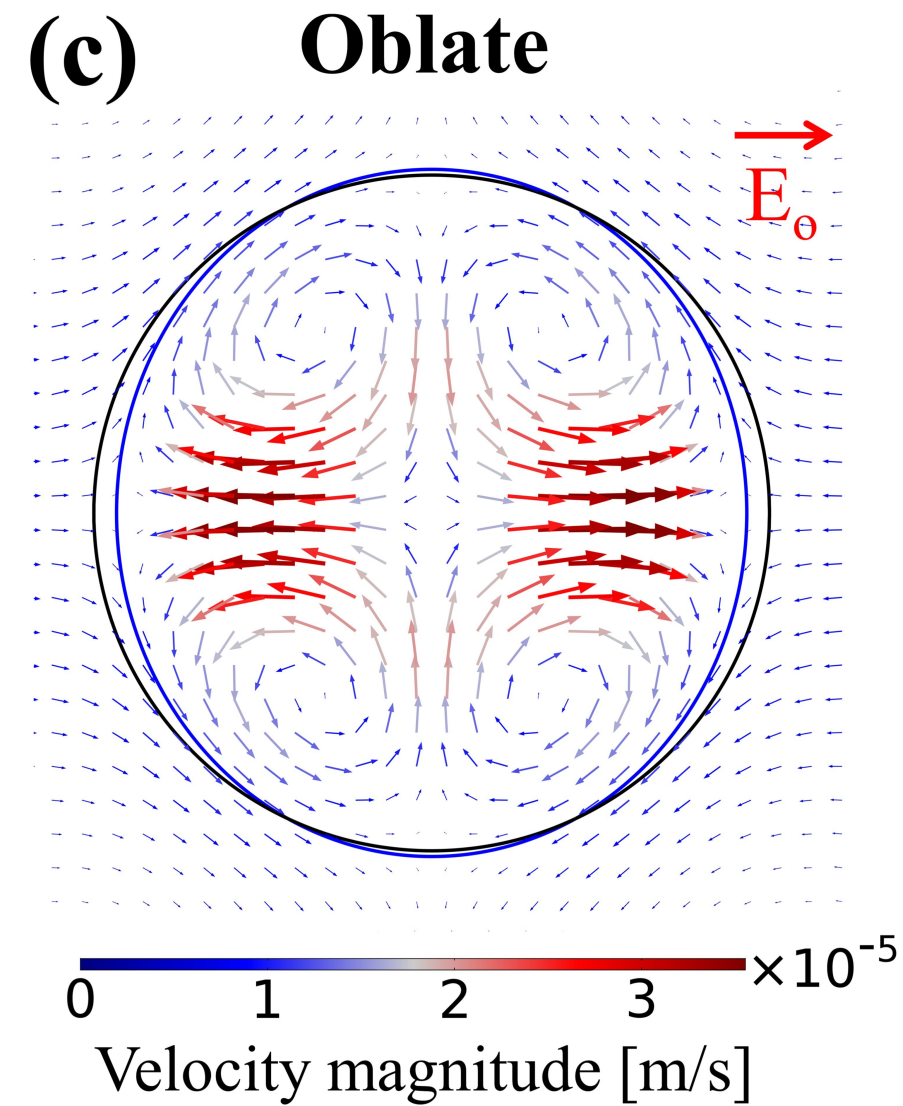

$$S/R > 1$$
$$R=0.029, S=0.68$$

Supplement: c8sm01750f3.pdf [file c8sm01750f3.pdf]

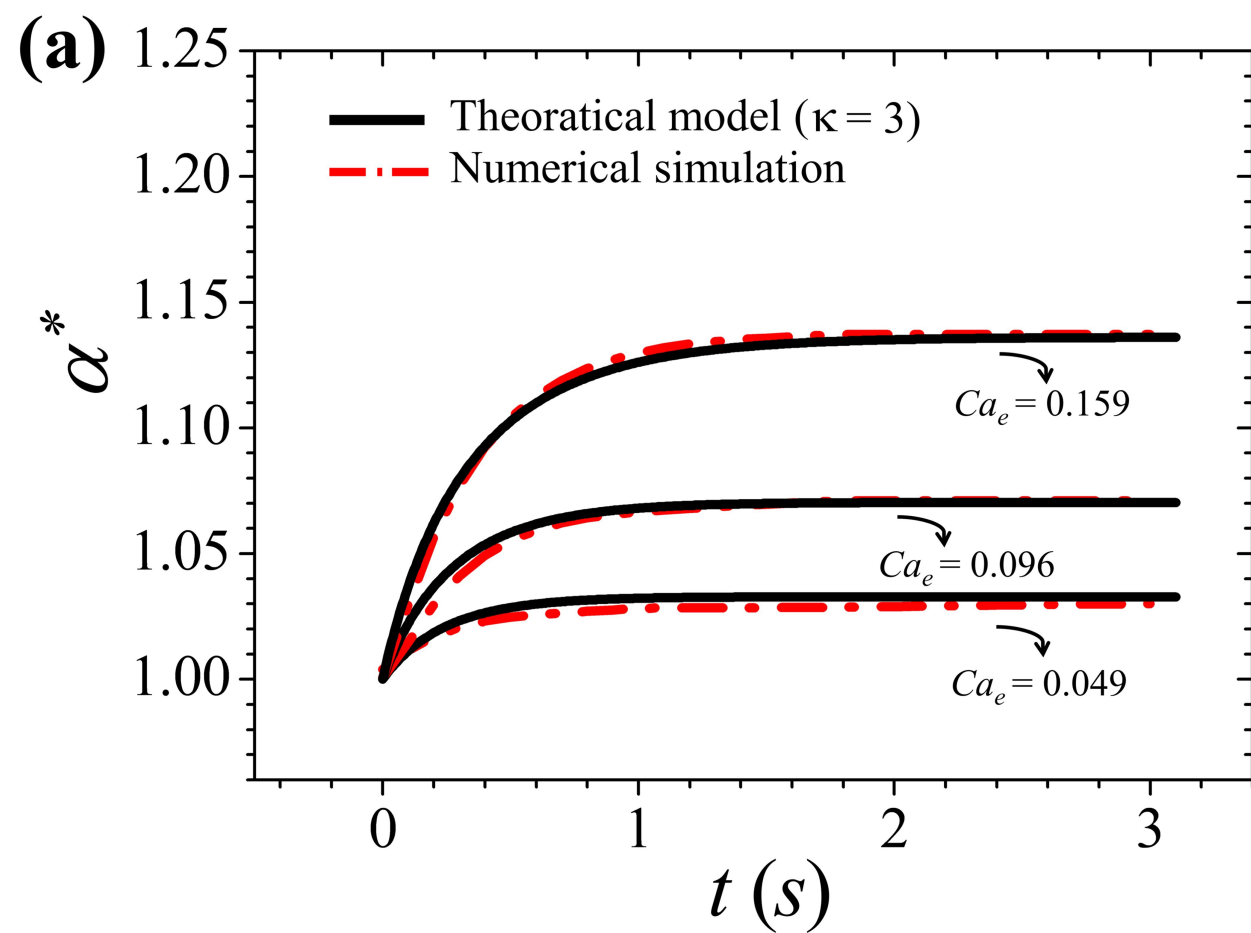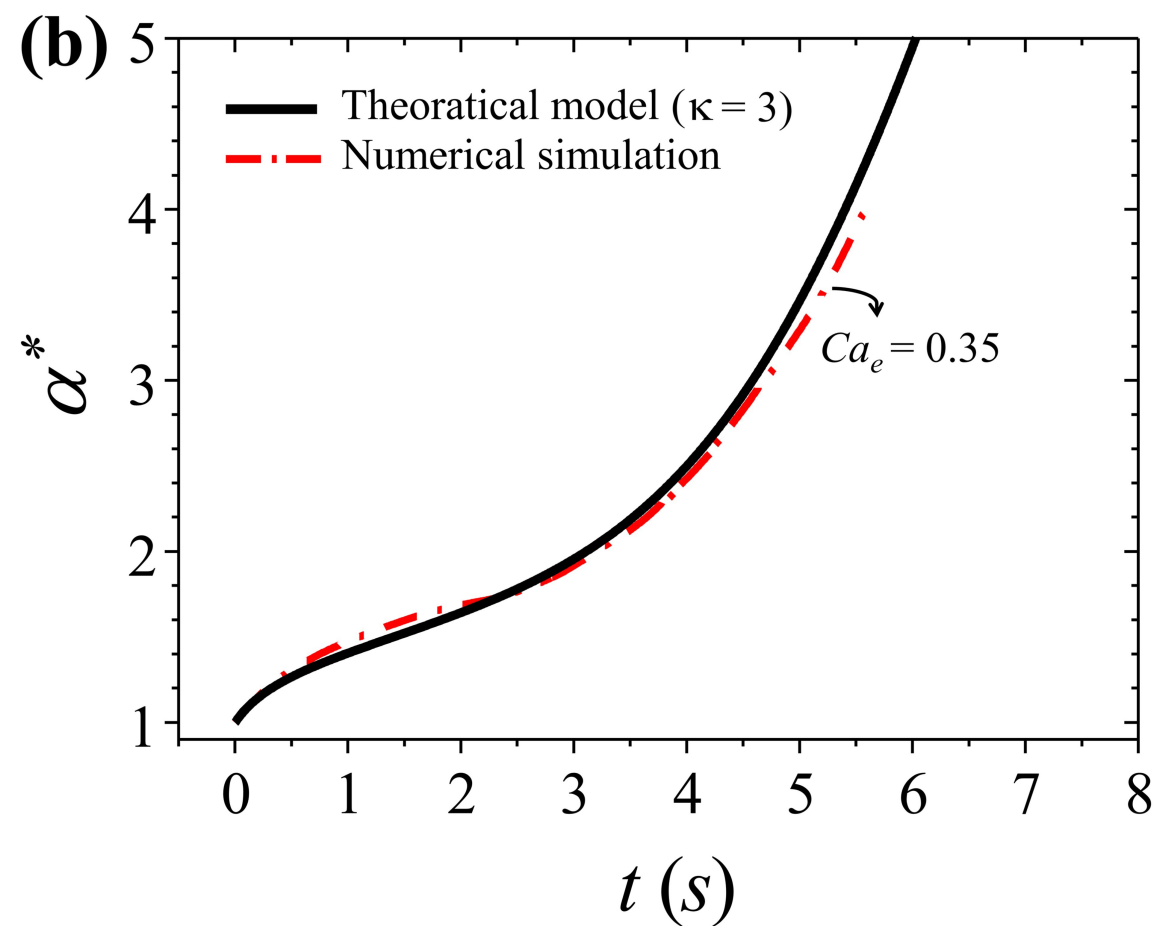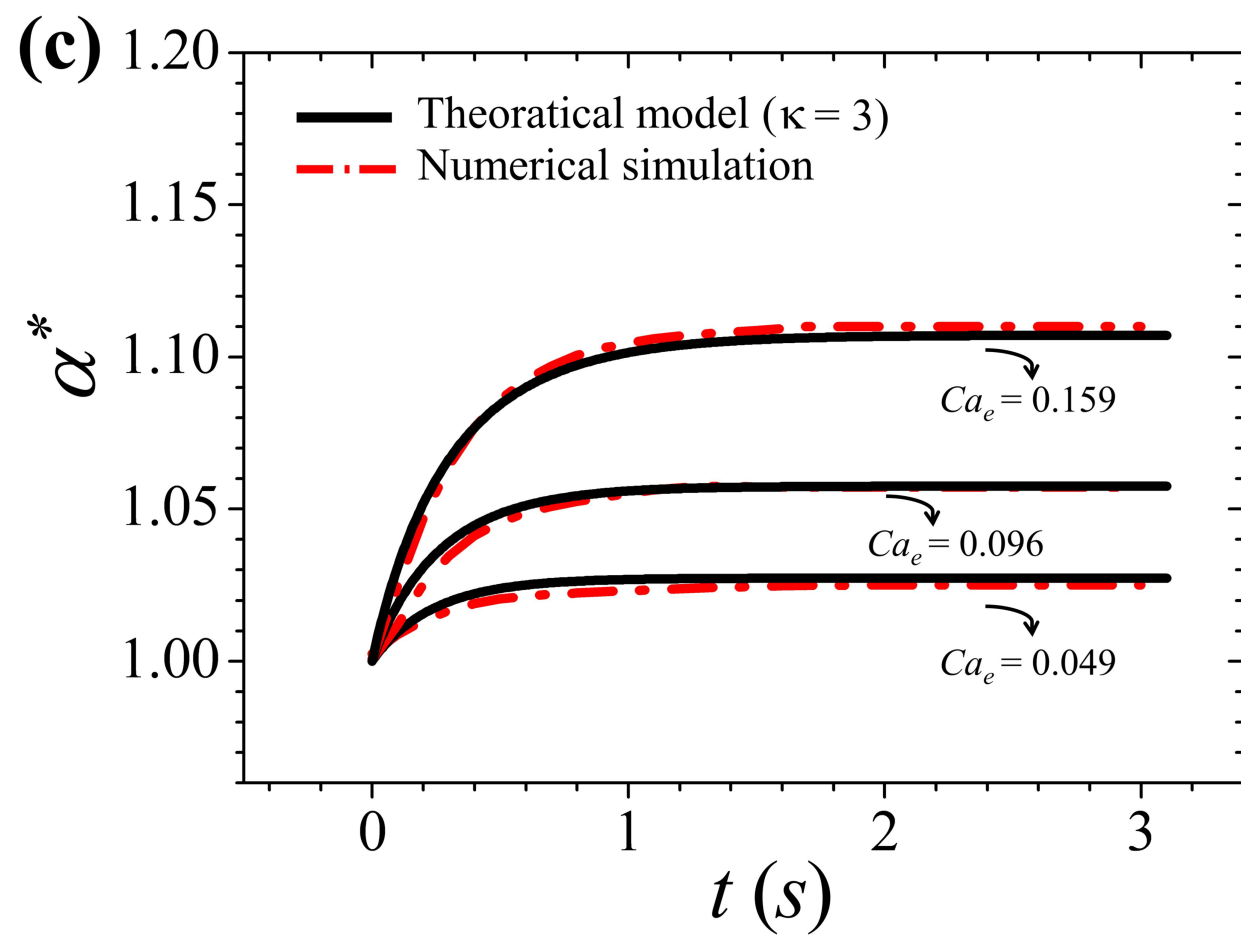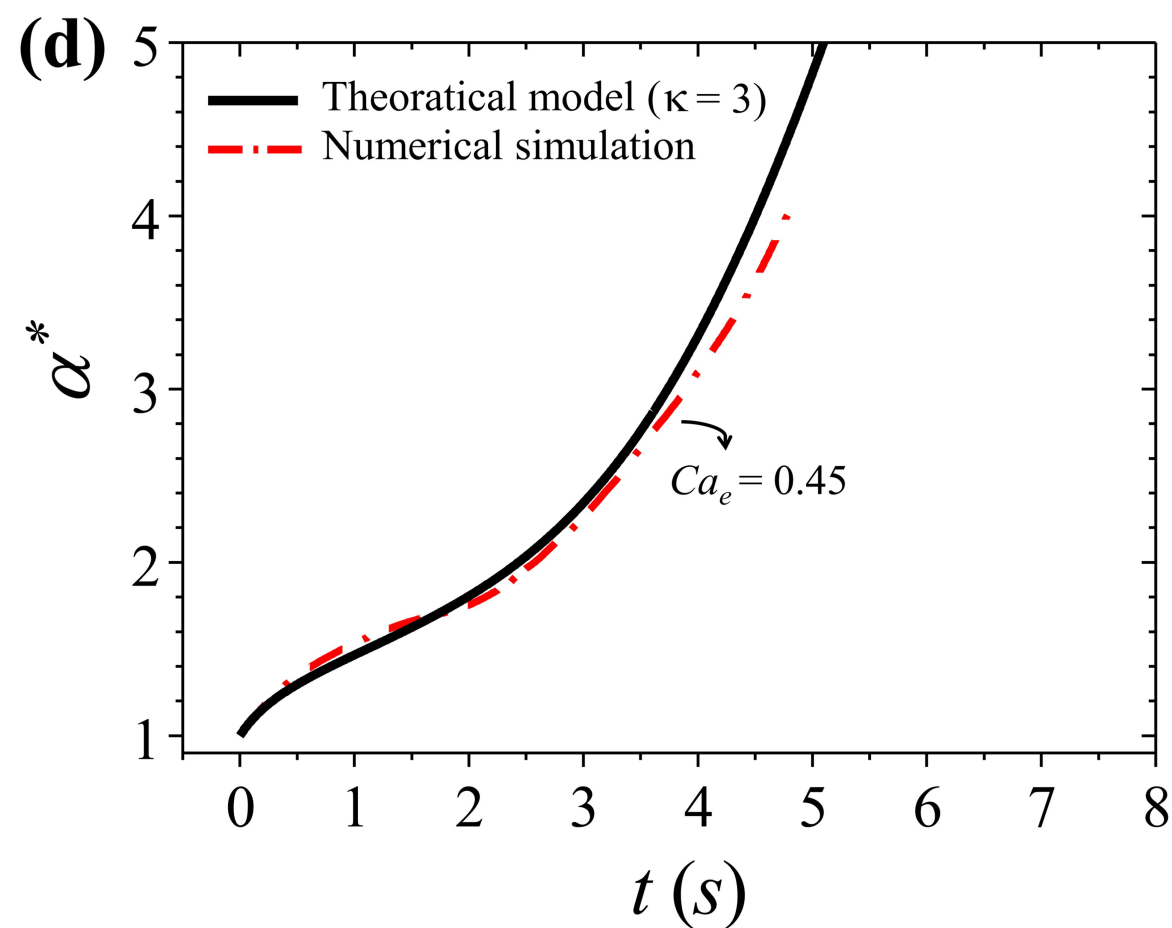

Supplement: c8sm01750f6.pdf [file c8sm01750f6.pdf]
